# Supplementary material
Source: PubMed Central journal article supplement (PMC3424327)

Supp. Figure 1

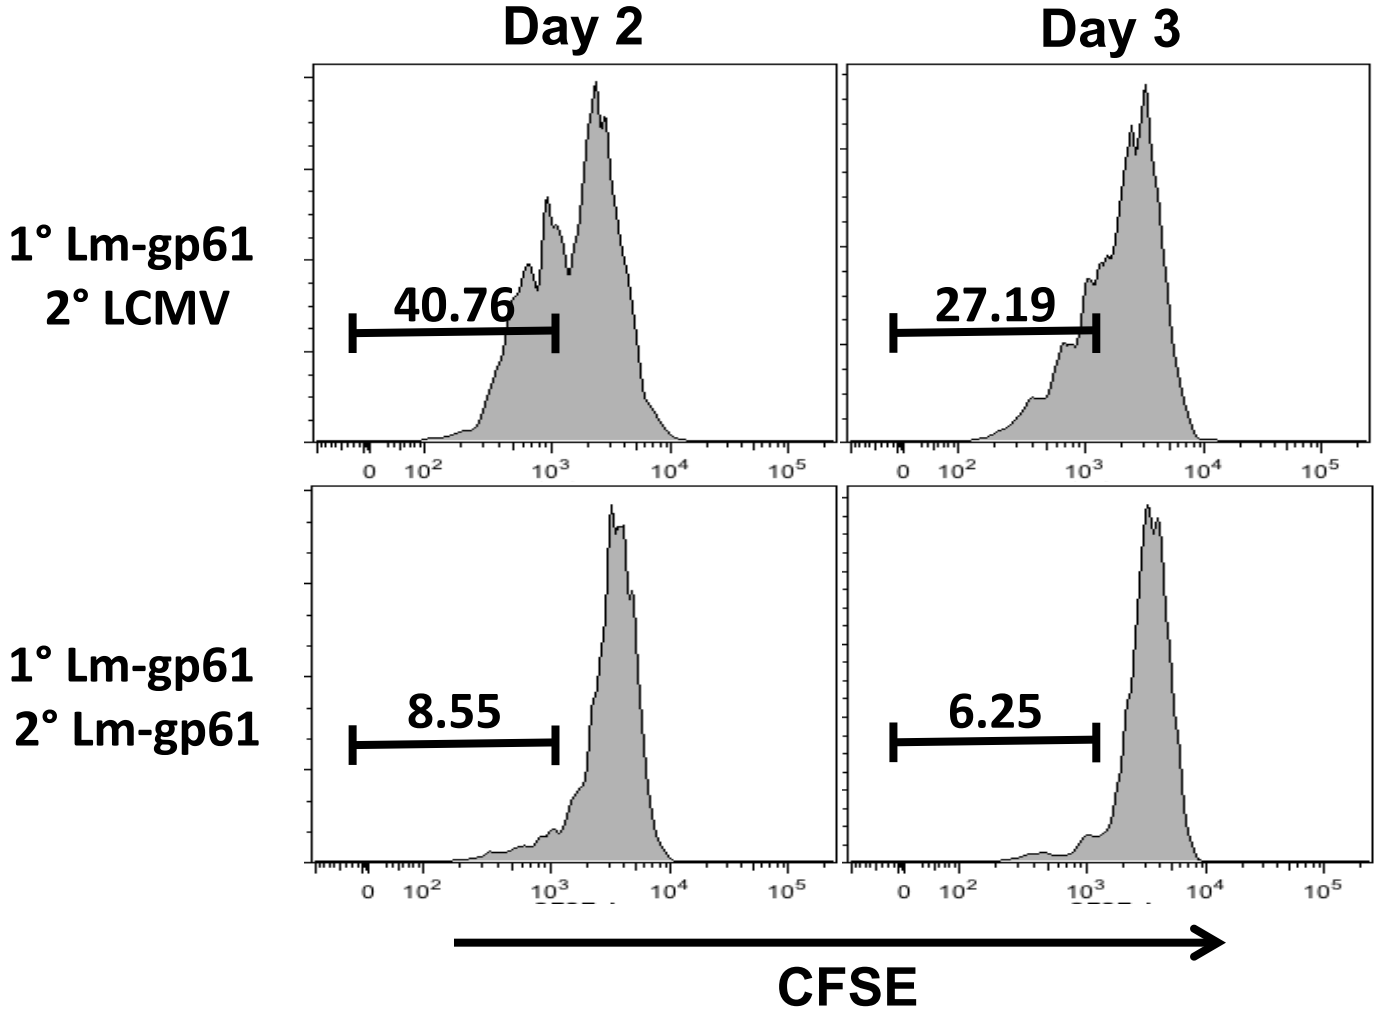

Supp. Figure 2

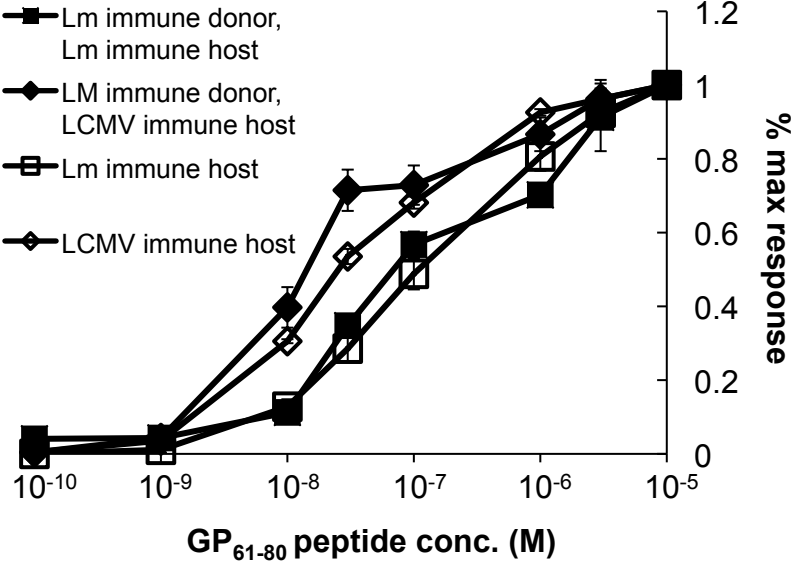

**Supp. Figure 3**

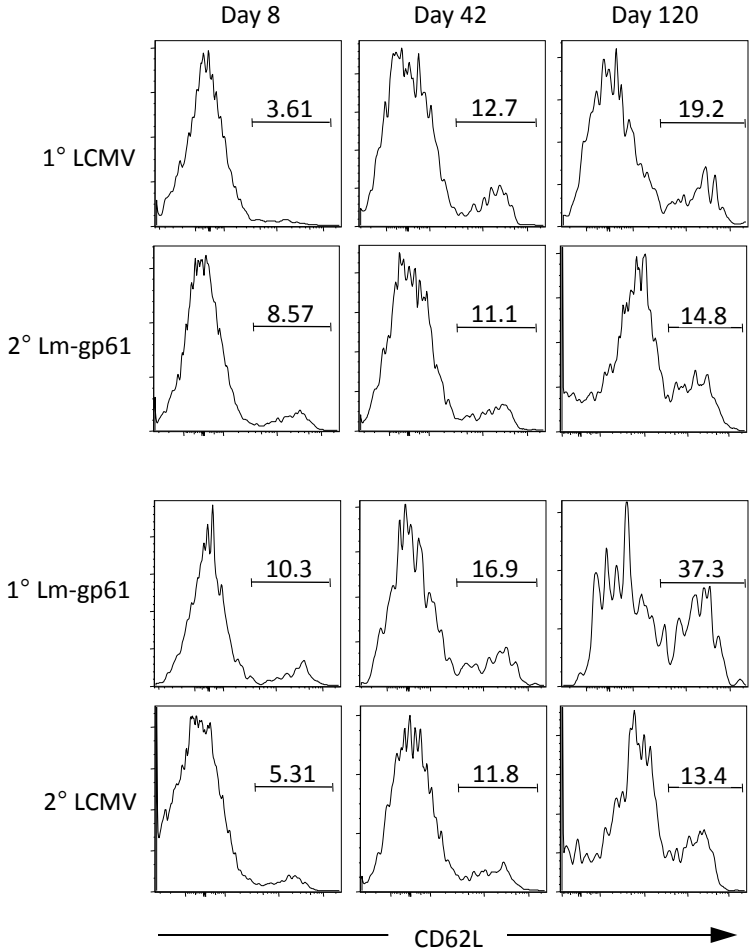

**Supp. Figure 4**

**A)**

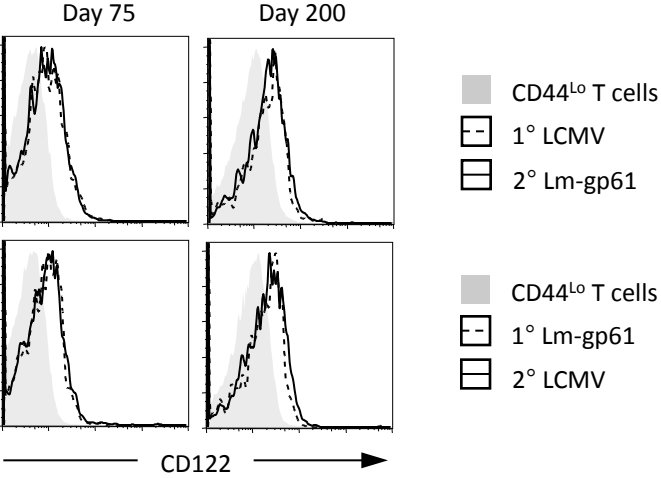

**B)**

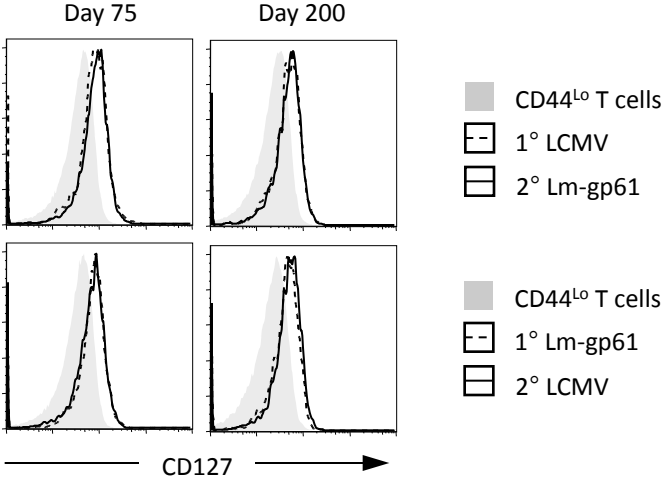

**C)**

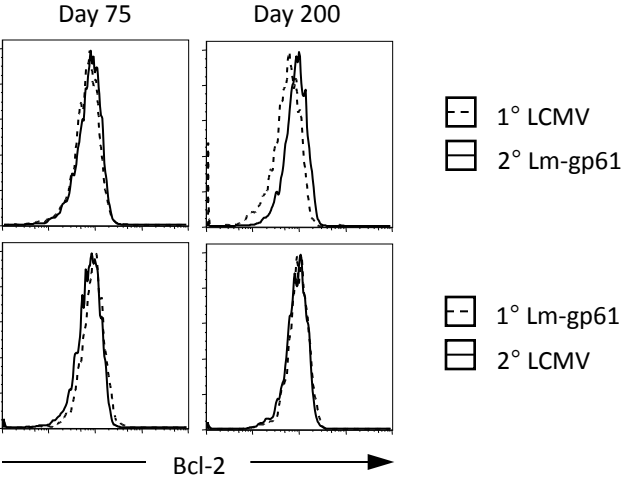

Supplement: NIHMS392247-supplement-2.pdf [file NIHMS392247-supplement-2.pdf]
